# Supplementary material
Source: publisher site journal article supplement (http://kjim.org/upload/media/kjim-2022-396-Supplementary-Fig-1.pdf)
Supplement: Supplementary file 1 [file kjim-2022-396-Supplementary-Fig-1.pdf]

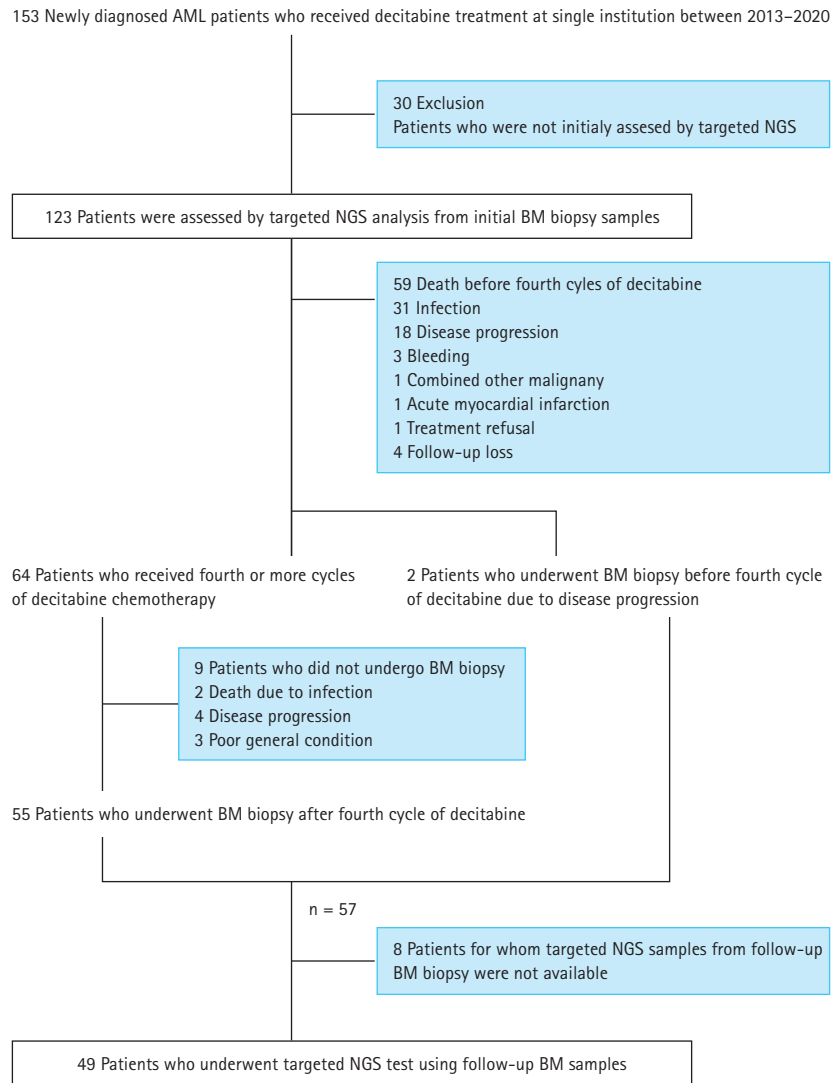

**Supplementary Figure 1.** Case distribution of genetic mutations assessed by next-generation sequencing (NGS) analysis. AML, acute myeloid leukemia; BM, bone marrow.
